# Supplementary material for: Analysis of the Peritumoral Tissue Unveils Cellular Changes Associated with a High Risk of Recurrence
Source: MDPI journal article supplement (doi:10.3390/cancers15133450), 2023-06-30

Supplementary Table S1 . Results of an immune score of principal inflammatory components corresponding to the global clustering presented in Figure 8 .

|       | M2          | M0           | Monocytes   | Mast cells resting | Plasma cells | B cells memory | T cells CD4 naive | Neutrophils | T cells follicular helper 1 | Tregs       | NK cells resting | T cells CD4 memory | Dendritic cells resting | Dendritic cells active | T cells gamma delta | B cells naive | Eosinophils | Mast cells activated | T cells CD4 memory | T cells CD8 | NK cells activated | GI genomic index |
|-------|-------------|--------------|-------------|--------------------|--------------|----------------|-------------------|-------------|-----------------------------|-------------|------------------|--------------------|-------------------------|------------------------|---------------------|---------------|-------------|----------------------|--------------------|-------------|--------------------|------------------|
| 8_R1  | 0.072430822 | 0.0141242871 | 0.320189911 | 0                  | 0.015749279  | 0.005358673    | 0.00846844        | 0.128394379 | 0.013166686                 | 0.001382255 | 0.012968643      | 0                  | 0                       | 0.00796272             | 0                   | 0             | 0           | 0.245395292          | 0.015098559        | 0.006860203 | 0.132295615        | NA               |
| 20_HT | 0.052666167 | 0            | 0.206615918 | 0                  | 0.020227272  | 0.01144062     | 0                 | 0.099313742 | 0.040444726                 | 0.037689594 | 0                | 0                  | 0.006049236             | 0                      | 0                   | 0             | 0           | 0.059654467          | 0.03945693         | 0.150155826 | NA                 | NA               |
| 1_R1  | 0.160023808 | 0.069997246  | 0.279319958 | 0                  | 0.005627551  | 0.00174887     | 0                 | 0.162833943 | 0                           | 9.00E-04    | 0                | 0                  | 0                       | 0                      | 0                   | 0             | 0           | 0.376363963          | 0.101757184        | 0.009891991 | 0.031561506        | NA               |
| 8_HT  | 0.035846109 | 0.072069769  | 0.301184452 | 0                  | 0.056344173  | 0.125129229    | 0                 | 0.068390555 | 0                           | 0           | 0                | 0.067332479        | 0                       | 0                      | 0.006076408         | 0             | 0           | 0.097253772          | 0.104564421        | 0.049134429 | 0.016674203        | NA               |
| 17_HT | 0.093750494 | 0            | 0.273476343 | 0.011484737        | 0.234173356  | 0.018728734    | 0                 | 0.041739118 | 0.027908236                 | 0           | 0.092567209      | 0.047838045        | 0                       | 0                      | 0.014328396         | 0.055023254   | 0.053334893 | 0.035647185          | NA                 | NA          | NA                 |                  |
| 11_HT | 0.109753203 | 0            | 0.275743083 | 0.066475112        | 0.201164959  | 0              | 0                 | 0.076110595 | 0.003451739                 | 0           | 0.024779119      | 0                  | 0                       | 0.004143695            | 0.005377513         | 0             | 0           | 0.034386662          | 0.087871496        | 0.034142181 | 0.076600644        | NA               |
| 13_HT | 0.186933736 | 0            | 0.29229634  | 0                  | 0.137647147  | 0.040868258    | 0.047687762       | 0.034144024 | 0.0233398                   | 0.003523593 | 0.014940788      | 0                  | 0                       | 8.00E-04               | 0                   | 0             | 0           | 0.119830447          | 0                  | 0.012971121 | 0.085062052        | NA               |
| 7_HT  | 0.163774052 | 0            | 0.350484979 | 0.031782343        | 0.110254837  | 0.094842556    | 0                 | 0.008897084 | 0                           | 0           | 0                | 0                  | 0                       | 0.004376275            | 0                   | 0             | 0           | 0.069206865          | 0.109253759        | 0.03066623  | 0.02646102         | NA               |
| 1_HT  | 0           | 0.023839736  | 0.514650311 | 0                  | 0.027040514  | 0.053450946    | 0.024715599       | 0           | 0.00556167                  | 0           | 0.053626111      | 0                  | 0                       | 0.011204851            | 0                   | 0             | 0           | 0.087070401          | 0.044649771        | 0.024093832 | 0.13009626         | NA               |
| 19_HT | 0.016140521 | 0.082749947  | 0.311066623 | 0.256509216        | 0.001313185  | 0.013619946    | 0                 | 0.001010802 | 0.005383106                 | 0           | 0.035659661      | 0                  | 0                       | 0.038730274            | 0                   | 0             | 0           | 0.038987421          | 0.112402044        | 0.04697927  | 0.039537985        | NA               |
| 6_T   | 0.04197721  | 0.483908856  | 0.032494976 | 0.016407287        | 0            | 0.049708486    | 0                 | 0           | 0.044257907                 | 0.011340067 | 0.022937976      | 0                  | 0                       | 0.007148579            | 0.046421762         | 0             | 0           | 0                    | 0.16345951         | 0.070939385 | 17                 | NA               |
| 13_T  | 0.356027658 | 0.533422275  | 0.002748008 | 0                  | 0            | 0.015325175    | 0.003833875       | 0           | 0                           | 0           | 0                | 0                  | 0                       | 0                      | 0.039046411         | 0.04634626    | 0           | 0.039046411          | 0.04634626         | 0.014961972 | 114                | NA               |
| 11_T  | 0.185134283 | 0.513775624  | 0           | 0                  | 0.039009549  | 0.103491892    | 0.029384979       | 0.03607056  | 0.010843074                 | 0.01955796  | 0.017229538      | 0.011619218        | 0.003451546             | 0.007494464            | 0                   | 0             | 0           | 0.015604569          | 0.007332744        | 0           | 0                  | 158              |
| 17_T  | 0.346246533 | 0.110995358  | 0           | 0                  | 0.029786803  | 0.069067386    | 0                 | 0.025964992 | 0.030779958                 | 0.009047122 | 0.02918709       | 0.014705615        | 0                       | 0                      | 0.171268644         | 0             | 0           | 0.171268644          | 0                  | 0.144070637 | 0                  | 385              |
| 2_T   | 0.4119461   | 0.269015599  | 0           | 0                  | 0            | 0.005586164    | 0.020843986       | 0.002978761 | 0.071224612                 | 0.017838963 | 0.001144298      | 0                  | 0                       | 0                      | 0                   | 0             | 0           | 0.12097856           | 0                  | 0.078442958 | 277                | NA               |
| 10_T  | 0.271601389 | 0.265385862  | 0           | 0.03778118         | 0.01484201   | 0.093029275    | 0.005217464       | 0.020222482 | 0.018640336                 | 0.048475718 | 0                | 0                  | 0                       | 0                      | 0.036527705         | 0.008829895   | 0           | 0.036527705          | 0.008829895        | 0.075771716 | 134                | NA               |
| 20_T  | 0.301976551 | 0.287257013  | 0.027406507 | 0                  | 4.00E-04     | 0.043939695    | 0                 | 0           | 0.037943624                 | 0           | 0.08174855       | 0                  | 0                       | 0                      | 0.05419425          | 0.103906159   | 0.020265934 | 0.05419425           | 0.103906159        | 0.040989721 | 49                 | NA               |
| 14_T  | 0.317876709 | 0.330073562  | 0.020604504 | 0                  | 0.004513054  | 0.020241717    | 0                 | 0.011475861 | 0.004474526                 | 0.027351277 | 0.001            | 0                  | 0                       | 0.124633904            | 0.090796253         | 0.000796253   | 0.124633904 | 0.090796253          | 0.000796253        | 192         | NA                 |                  |
| 10_R1 | 0.435970709 | 0            | 0.045569678 | 0                  | 0.022381014  | 0.029073008    | 0                 | 0.00485489  | 0.027606557                 | 0.023783681 | 0                | 0                  | 0                       | 0                      | 0                   | 0             | 0           | 0.215183019          | 0.073817618        | 0.027637283 | 0.110386174        | NA               |
| 13_R1 | 0.363800881 | 0            | 0.11861146  | 0                  | 0.001474317  | 0.00681853     | 0                 | 0.002022908 | 0.015112806                 | 0.047267683 | 0                | 0                  | 0                       | 0                      | 0.246555086         | 0.098791384   | 0.016870943 | 0.246555086          | 0.098791384        | 0.016870943 | 0.082674001        | NA               |
| 5_R1  | 0.365615659 | 0            | 0.156311379 | 0                  | 0.019144849  | 0              | 0.04850545        | 0.002376601 | 0.006106641                 | 0.001205916 | 0                | 0                  | 0                       | 0                      | 0                   | 0             | 0           | 0.152431495          | 0.10645099         | 0.027547828 | 0.114301392        | NA               |
| 15_HT | 0.318623245 | 0            | 0.074417474 | 0.045774447        | 0.053326313  | 0.007500983    | 0                 | 0.016358017 | 0.025835495                 | 0           | 0                | 0                  | 0                       | 0                      | 0                   | 0             | 0           | 0.130894879          | 0.090338358        | 0.0781763   | 0.158753158        | NA               |
| 15_R1 | 0.330187568 | 0            | 0.089222324 | 0                  | 0.029124704  | 0.029777954    | 0                 | 4.00E-04    | 0.017059231                 | 0           | 0                | 0                  | 0.007731463             | 0                      | 0.208986944         | 0.063947722   | 0.140195982 | 0.208986944          | 0.063947722        | 0.140195982 | NA                 | NA               |
| 18_T  | 0.370352739 | 0            | 0.079561555 | 0.038958616        | 0.006623238  | 0.012278898    | 0.145949875       | 7.00E-04    | 0.005755648                 | 0.052170574 | 0.06894405       | 0                  | 0.002968818             | 0                      | 0.09459125          | 0             | 0           | 0.09459125           | 0                  | 0.121137211 | 5                  | NA               |
| 17_R1 | 0.457091918 | 0            | 0.064035241 | 0.023756617        | 0.010077771  | 0.025925087    | 9.00E-04          | 0.005060048 | 0.026246716                 | 0           | 0                | 0                  | 0                       | 0                      | 0.085087038         | 0.058249567   | 0.126112439 | 0.085087038          | 0.058249567        | 0.126112439 | NA                 | NA               |
| 12_HT | 0.423406669 | 0            | 0.105277472 | 0.124680577        | 0.031727326  | 0.039210655    | 0                 | 0           | 0                           | 0           | 0                | 0                  | 0                       | 0                      | 0.072040054         | 0.082964172   | 0.119759075 | 0.072040054          | 0.082964172        | 0.119759075 | NA                 | NA               |
| 11_R1 | 0.417102553 | 0            | 0.059727748 | 0.122369409        | 0.054596052  | 0              | 0                 | 0.012609424 | 0.020133457                 | 0           | 0                | 0                  | 0                       | 0.004261932            | 0.054581471         | 0.152389351   | 0.054581471 | 0.152389351          | 0.054581471        | 0.152389351 | NA                 | NA               |
| 6_R1  | 0.478738751 | 0            | 0.08484571  | 0.104081531        | 0.010588194  | 0.057736749    | 0                 | 0.024920761 | 0.010208252                 | 0.010110582 | 0                | 0                  | 0.007896901             | 0                      | 0.101002837         | 0.030207949   | 0.079661782 | 0.101002837          | 0.030207949        | 0.079661782 | NA                 | NA               |
| 9_R1  | 0.426597587 | 0.03352278   | 0.0644605   | 0.085370538        | 0.006493447  | 0.037127412    | 0                 | 0.002994188 | 0.057826229                 | 0           | 0                | 0                  | 0.006074782             | 0                      | 0.121720747         | 0.064505796   | 0.111229994 | 0.121720747          | 0.064505796        | 0.111229994 | NA                 | NA               |
| 7_R1  | 0.409618378 | 0            | 0.175027668 | 0.115530455        | 0.018841845  | 0.057783053    | 0.055721902       | 0           | 0.005518557                 | 0.015673675 | 0                | 0                  | 0                       | 0                      | 0.113905061         | 0.032379406   | 0.032379406 | 0.113905061          | 0.032379406        | 0.032379406 | NA                 | NA               |
| 7_T   | 0.42839347  | 0            | 0.249184695 | 0.069387284        | 0.005047239  | 0.029910724    | 0                 | 0           | 0                           | 0           | 0.02772518       | 0.07056217         | 0                       | 0.030854844            | 0                   | 0             | 0           | 0.030444293          | 0.058490102        | 0           | 138                | NA               |
| 4_R1  | 0.284576764 | 0            | 0.27186171  | 0.007065703        | 0.011951628  | 0.001297208    | 0.010470826       | 0           | 0.001116019                 | 0.04420606  | 0.004130772      | 0                  | 0                       | 0.003369781            | 0.013415806         | 0.093835738   | 0.090315627 | 0.093835738          | 0.090315627        | 0.162386357 | NA                 | NA               |
| 4_HT  | 0.222176349 | 0            | 0.23400013  | 0.15993978         | 0.004142026  | 0.013483721    | 0                 | 0.063732701 | 0.008296784                 | 0.013630413 | 0                | 0                  | 0                       | 0                      | 0.115840564         | 0.053101929   | 0.11655603  | 0.115840564          | 0.053101929        | 0.11655603  | NA                 | NA               |
| 5_T   | 0.271261313 | 0            | 0.161486426 | 0.058276019        | 0.008758079  | 0.118668415    | 0                 | 0.030706828 | 0.046805611                 | 0.020942935 | 0                | 0.009114062        | 0.003695873             | 0                      | 0.110045711         | 0.073471701   | 0.086567027 | 0.110045711          | 0.073471701        | 0.086567027 | 109                | NA               |
| 4_T   | 0.25808695  | 0            | 0.133481349 | 0.017812423        | 0.008369444  | 0.02801677     | 0                 | 0.007317289 | 0.067080251                 | 0.039512929 | 0                | 0.005152682        | 0                       | 0.130835656            | 0.199061561         | 0.10998779    | 0.130835656 | 0.199061561          | 0.10998779         | 65          | NA                 |                  |
| 15_T  | 0.411615564 | 0            | 0.115232668 | 0.110976744        | 0.005716844  | 0.00833485     | 0                 | 0.016050391 | 0                           | 0           | 0.054432313      | 0                  | 0                       | 0.037228783            | 0.160733243         | 0.079679964   | 0.037228783 | 0.160733243          | 0.079679964        | 16          | NA                 |                  |
| 9_T   | 0.261313465 | 0            | 0.098479705 | 0.138498404        | 0.013834177  | 0.045161708    | 0                 | 0.019508675 | 0                           | 0.019508675 | 0.112767662      | 0.004615951        | 0.005195308             | 0                      | 0.037178845         | 0.06593542    | 0.116329142 | 0.037178845          | 0.06593542         | 0.116329142 | 97                 | NA               |
| 5_HT  | 0.249125198 | 0            | 0.129790461 | 0.082881053        | 0.115768085  | 0.094306266    | 0.045814431       | 0.030431224 | 0.013154077                 | 0.009223531 | 0.010062266      | 0                  | 0                       | 0                      | 0                   | 0             | 0           | 0.010062266          | 0.009223531        | 0.010062266 | 0.009223531        | NA               |
| 16_T  | 0.265948051 | 0            | 0.084742686 | 0.148502227        | 0.049070381  | 0.121028186    | 0.072330146       | 0           | 0.00451446                  | 0.071142347 | 0.048175131      | 0                  | 0                       | 0                      | 0                   | 0             | 0           | 0.00451446           | 0.071142347        | 0.048175131 | 127                | NA               |
| 3_T   | 0.270789264 | 0.143457371  | 0.062964701 | 0.142653226        | 0.017841278  | 0.057870918    | 0                 | 0.010732125 | 0.00566325                  | 0.027437164 | 0                | 0                  | 0                       | 0.002141138            | 0.093887519         | 0.063918722   | 0.002141138 | 0.093887519          | 0.063918722        | 0.106040247 | 49                 | NA               |
| 10_R1 | 0.21719673  | 0.020448809  | 0.082008008 | 0.144185423        | 0.041878201  | 0.064301538    | 0                 | 0.005562018 | 0.049204579                 | 0           | 6.00E-04         | 0                  | 0                       | 0.144520461            | 0.128842575         | 0.101253296   | 0.144520461 | 0.128842575          | 0.101253296        | NA          | NA                 |                  |
| 2_R1  | 0.342451565 | 0            | 0.014140321 | 0.166266773        | 0.005068251  | 0.04467797     | 0                 | 0.003309286 | 0.00771178                  | 0.026351599 | 0                | 0.106171741        | 0                       | 0                      | 0.156189718         | 0.071021615   | 0.056459381 | 0.156189718          | 0.071021615        | 0.056459381 | NA                 | NA               |
| 3_R1  | 0.249240906 | 0            | 0.113009311 | 0.176400955        | 0.005454507  | 0              | 0.06178094        | 0           | 0.031350657                 | 0.00223393  | 0                | 0.02264036         | 0.05541264              | 0.060389963            | 0.083647739         | 0.105921903   | 0.083647739 | 0.105921903          | 0.105921903        | 0.032511818 | NA                 | NA               |
| 8_T   | 0.330215976 | 0            | 0.093047202 | 0.161703637        | 0.016820996  | 0.034757117    | 0                 | 0           | 0.051812988                 | 0.001273682 | 0                | 0.014486928        | 0                       | 0.037431705            | 0                   | 0.010401408   | 0.155102365 | 0.010401408          | 0.155102365        | 0.099249996 | 41                 | NA               |
| 16_R1 | 0.282688656 | 0            | 0.112852728 | 0.1                |              |                |                   |             |                             |             |                  |                    |                         |                        |                     |               |             |                      |                    |             |                    |                  |

Supplementary Table S2: Comparison of genomic index tumors from R1.h group vs R1.t group.

| Characteristic                       | 0, N=8 <sup>1</sup> | 1, N=12 <sup>1</sup> | p-value <sup>2</sup> |
|--------------------------------------|---------------------|----------------------|----------------------|
| Genomic index                        | 87.75               | 120.9                | 0.42                 |
| <sup>1</sup> Mean (SD)               |                     |                      |                      |
| <sup>2</sup> Welch Two Sample t-test |                     |                      |                      |

Supplementary Figure S1: Penetrance plot of data from CGH.

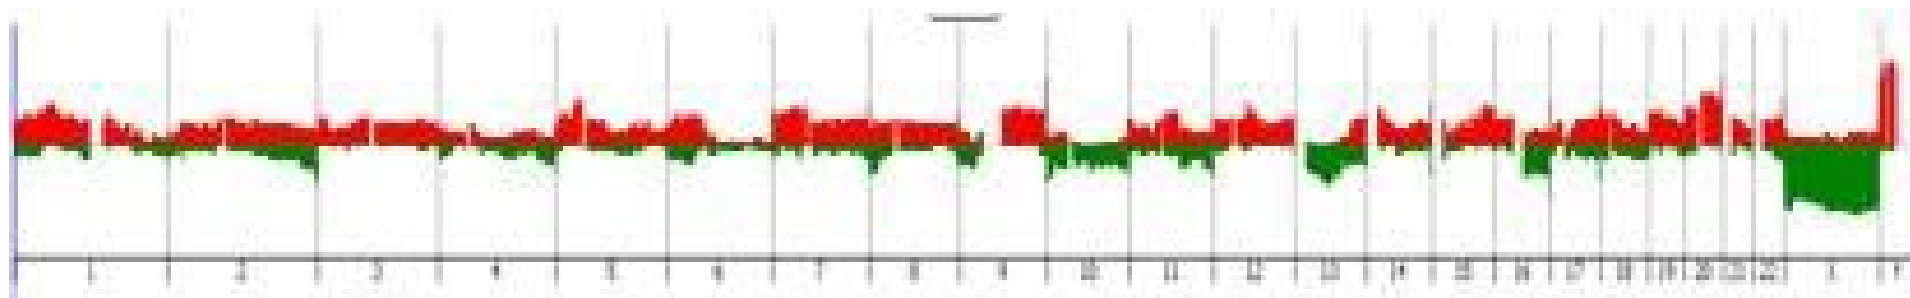

Supplementary Figure S2: Genomic profiles of other cases obtained by CGH.data 2

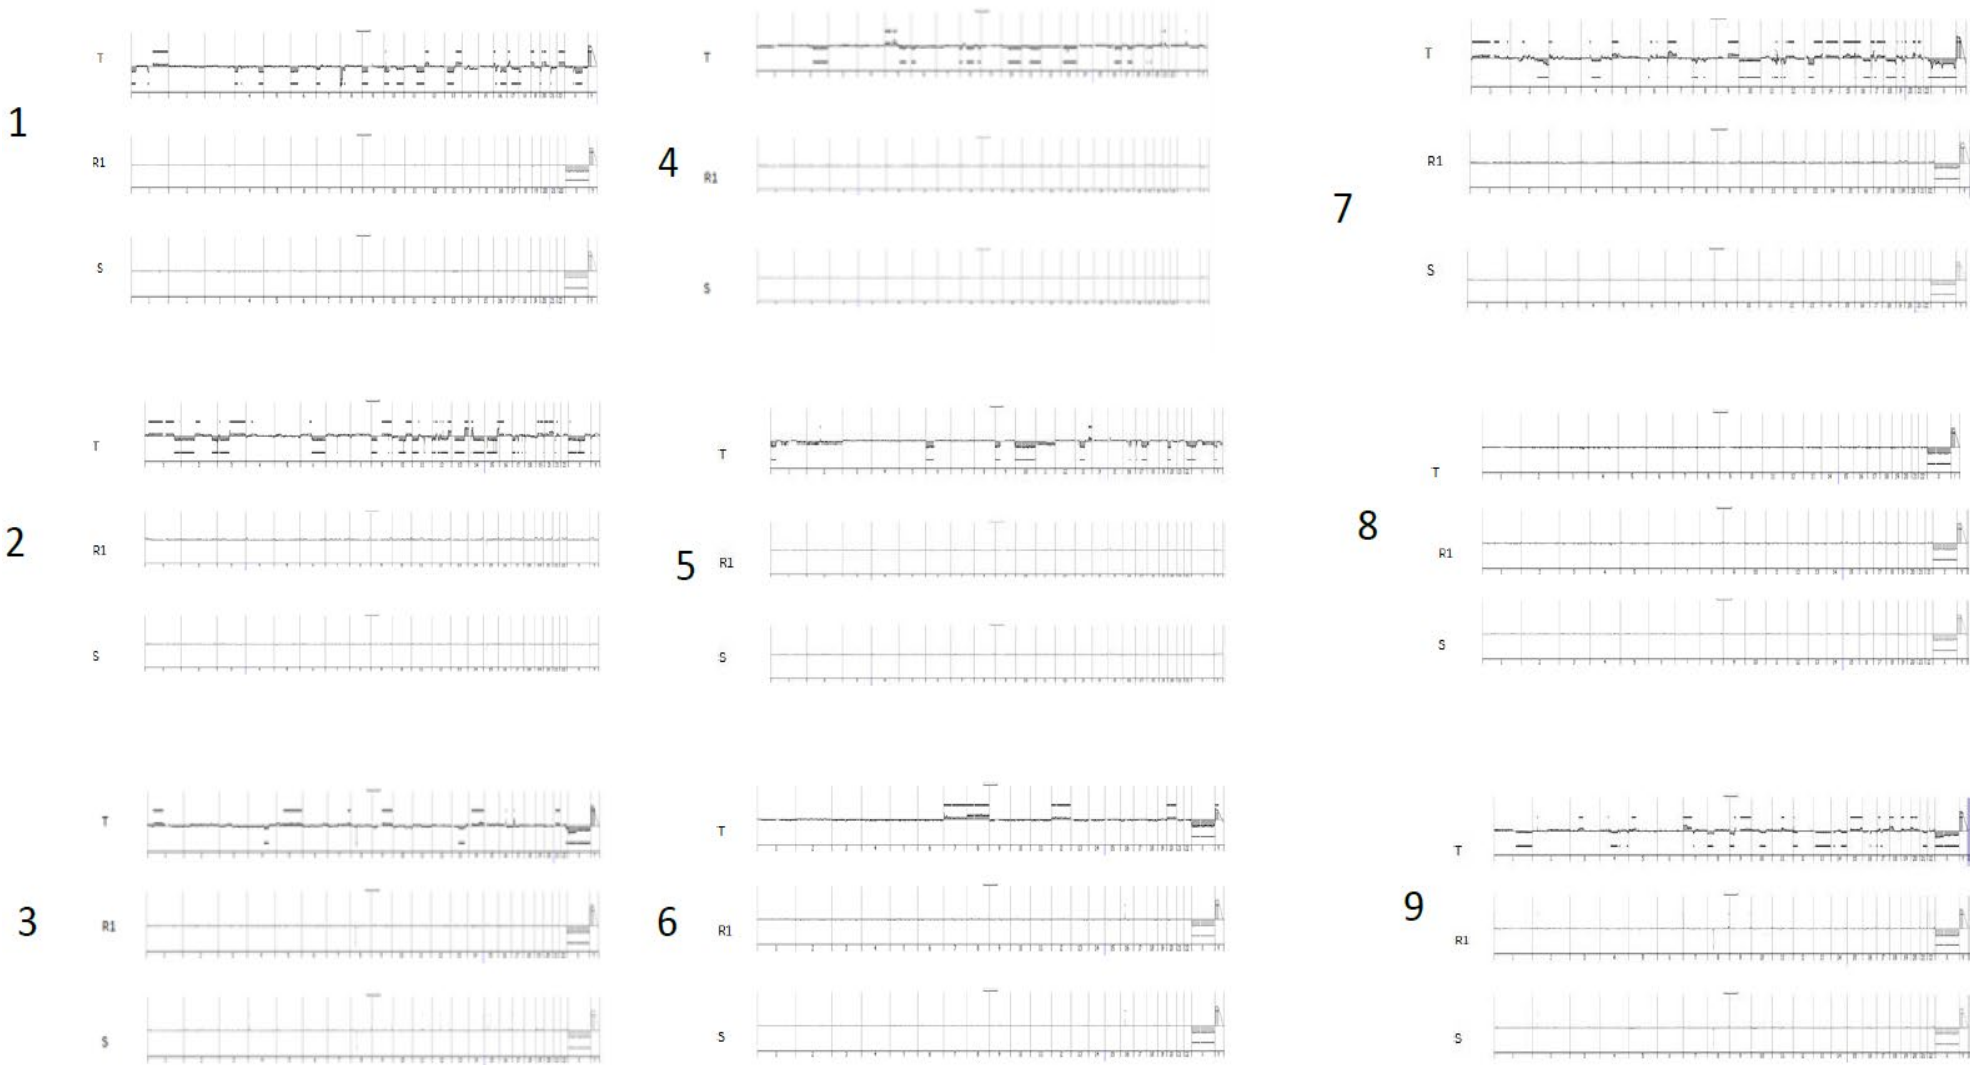

Figure 1 displays three ECG traces labeled T, R1, and S. The T trace shows a prominent T wave, while the R1 and S traces show smaller R and S waves, respectively.

19

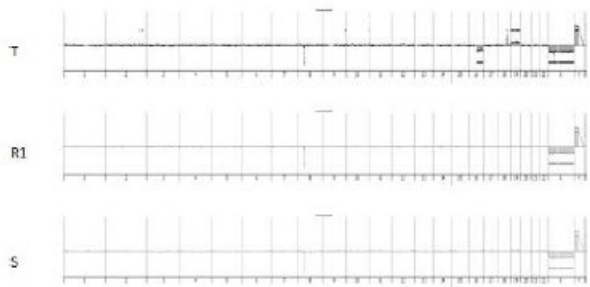

20

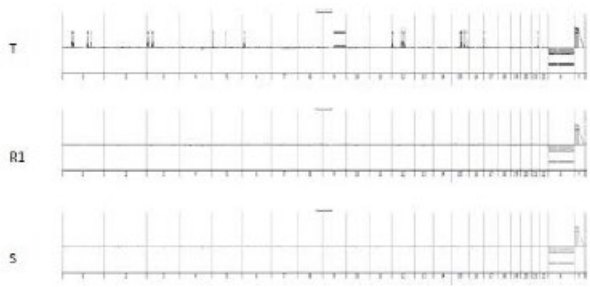

Supplementary Figure S3: Box plot of data of CIBERSORT between R1.h group vs R1.t group.

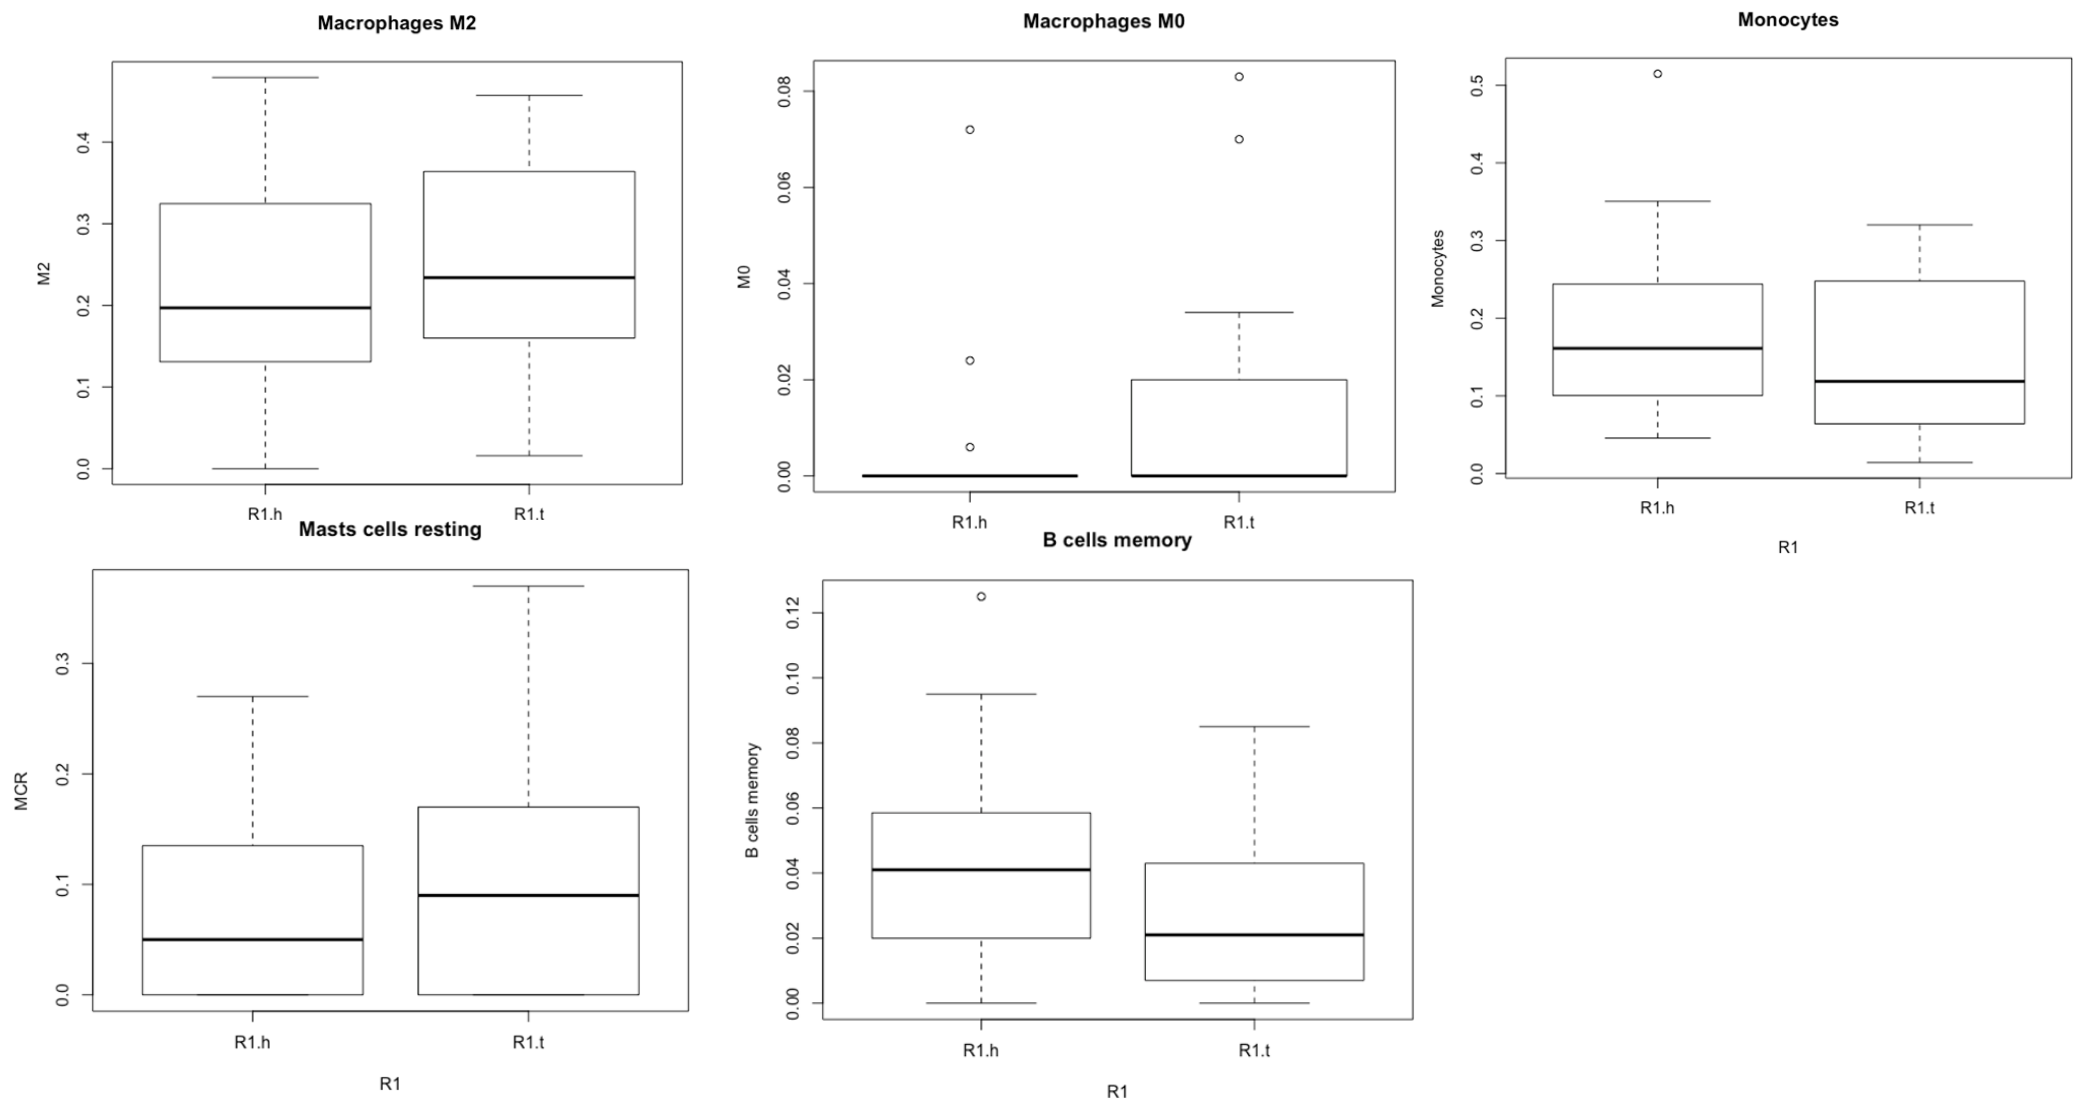

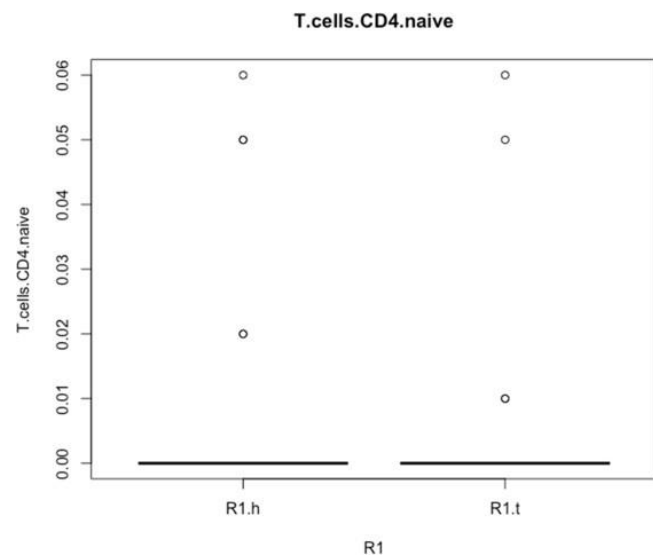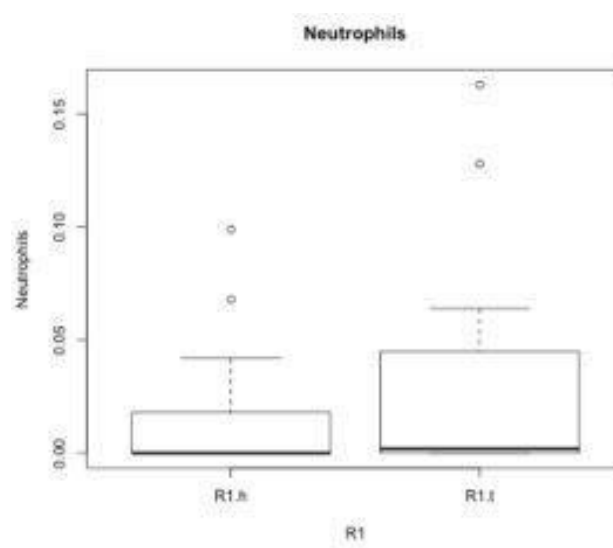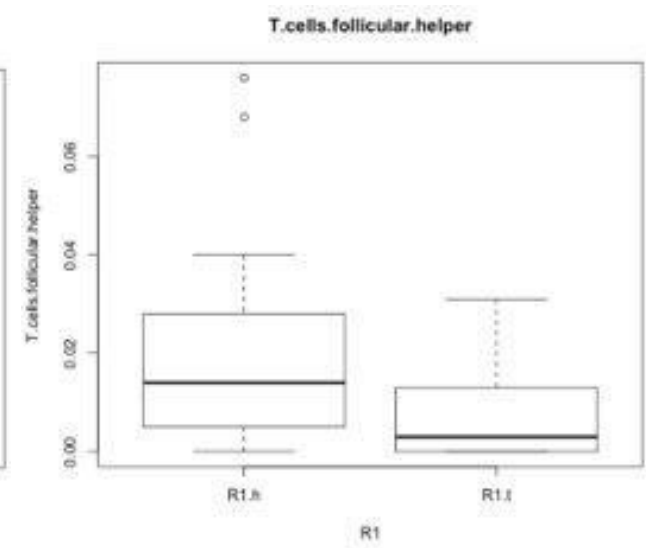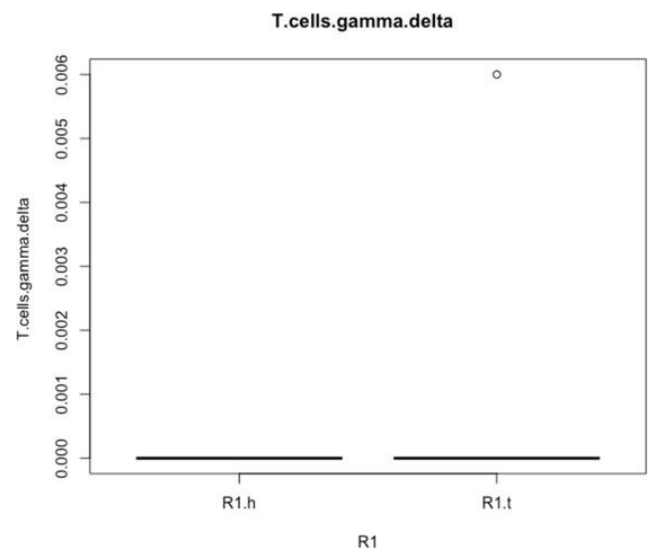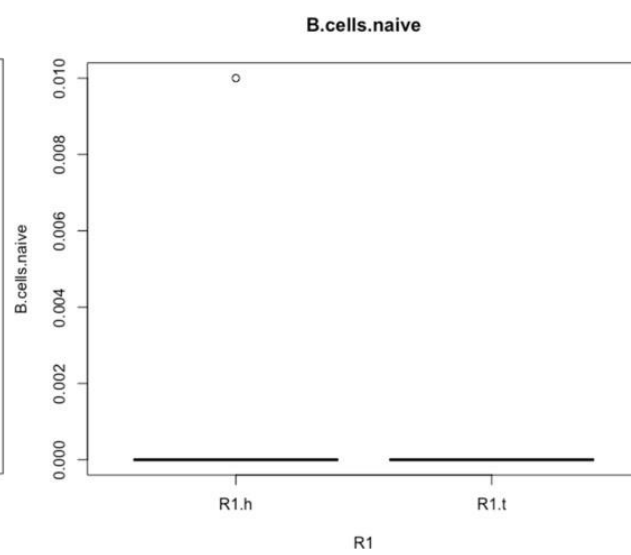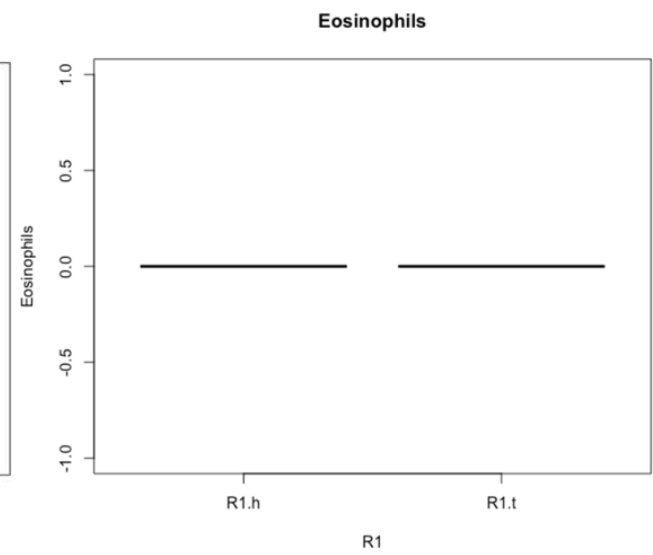



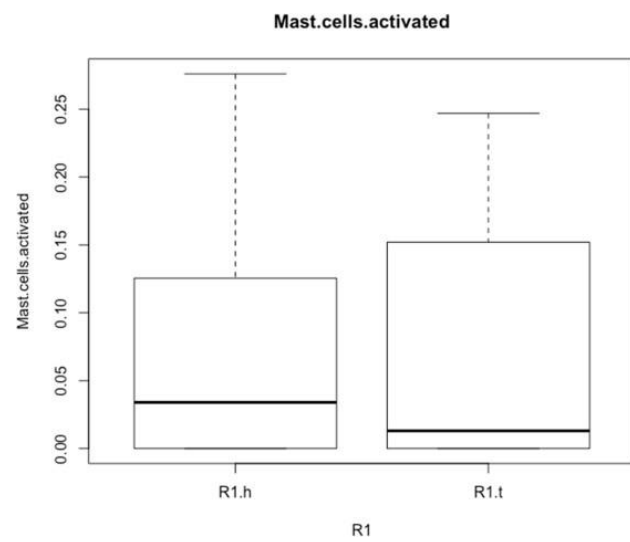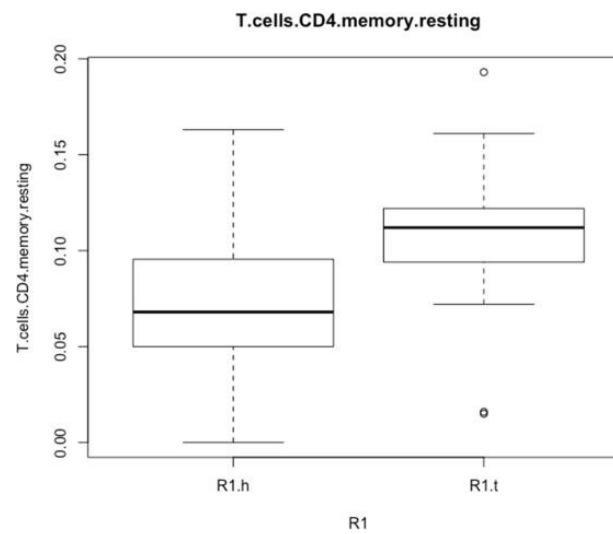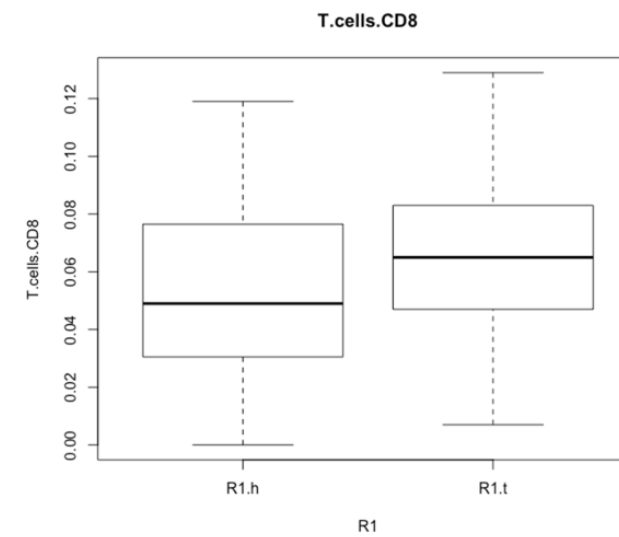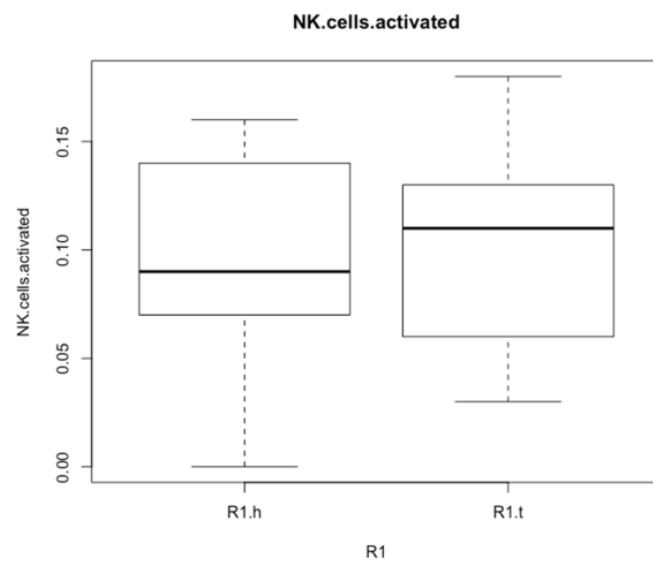

Supplement: s1 [file s1]
